# Supplementary material for: Development and Characterization of Cellulose/Iron Acetate Nanofibers for Bone Tissue Engineering Applications
Source: MDPI journal article supplement (doi:10.3390/polym13081339), 2021-04-20
Supplement: s1 [file s1]

Supporting information for:

**Development and Characterization of Cellulose /Iron Acetate Nanofibers for  
Bone Tissue Engineering Applications**

Hamouda M. Mousa<sup>1\*</sup>, Kamal Hany Hussein<sup>2,3</sup>, Mostafa M. Sayed<sup>4</sup>, Mohamed K. Abd El-  
Rahman<sup>5,6</sup>, Heung-Myong Woo<sup>7</sup>

<sup>1</sup>Department of Mechanical Engineering, Faculty of Engineering, South Valley University, Qena 83523, Egypt.

<sup>2</sup>Institute for Veterinary Science, College of Veterinary Medicine, Seoul National University, Seoul 08826, Republic of Korea.

<sup>3</sup> Department of Animal Surgery, College of Veterinary Medicine, Assiut University, Assiut 71515, Egypt.

<sup>4</sup> Mechanical Design and Materials Department, Faculty of Energy Engineering, Aswan University, Aswan 81542, Egypt.

<sup>5</sup> Analytical Chemistry Department, Faculty of Pharmacy, Cairo University, Kasr-El Aini Street, Cairo, Egypt 11562.

<sup>6</sup> Department of Chemistry and Chemical Biology, Harvard University, 12 Oxford Street, MA 02138, United States.

<sup>7</sup> Stem Cell institute, College of Veterinary Medicine & Institute of Veterinary Science, Kangwon National University, Chuncheon, Gangwon 24341, Republic of Korea.

**\*Corresponding author:**

H.M.Mousa ([hmousa@eng.svu.edu.eg](mailto:hmousa@eng.svu.edu.eg))

**Table. S1** Primers used for PCR analysis.

| Primer             | Primer sequences                     |                                              | Annealing Temperature<br>°C |
|--------------------|--------------------------------------|----------------------------------------------|-----------------------------|
|                    | Forward                              | Reverse                                      |                             |
| <b>Collagen I</b>  | 5'- CAG CCG CTT CAC CTA CAG<br>C -3' | 5'- TTT TGT ATT CAA TCA CTG<br>TCT TGC C -3' | 57.1                        |
| <b>Osteopontin</b> | 5'- CTC AGG CCA GTT GCA GCC<br>-3'   | 5'- CAA AAG CAA ATC ACT GCA<br>ATT CTC -3'   | -                           |
| <b>GAPDH</b>       | 5'-ACA GTC AGC CGC ATC TTC<br>TT-3'  | 5'-GAC AAG CTT CCC GTT CTC<br>AG-3'          | 59.7                        |
